# Supplementary material for: A Single-Nucleotide Polymorphism in an Endo-1,4-β-Glucanase Gene Controls Seed Coat Permeability in Soybean
Source: PLoS One. 2015 Jun 3;10(6):e0128527. doi: 10.1371/journal.pone.0128527 (PMC4454576; doi:10.1371/journal.pone.0128527)
Supplement: S1 Table — (XLSX) [file pone.0128527.s005.xlsx]

## Sheet: S1 table
S1 Table Primer sequences for SSR markers used in fine-mapping of qHS1
Marker	Forward primer (5'®3')	Reverse Primer (5'®3')
Sat_47791	GCCTCATAATGGTAGACTATTATG	GATCTCCATCTCACCACATAGTTTC
Sat_48082	CTATCTCAATGGTTAGTGAGAC	GGCTGGAATGTAATATGGGGATA
Sat_48269	CCGGTTTAGTAGGAGTACTAG	CCTCTCCTTATCCATCTCTC
Satt274	GCGGGGTCAATTAGTTTTCGTCAGTT	GCGCACGGTATATAATCGAACCTAT
Satt459	TCGTGTTAGATTTTTACTGTCACATT	AACTGCATACCCTTTGTTTGAA
Sat_48468	GACCAGAGAGAAAAGAGAGCAA	CCCTAGTTCGATTCAACAAA
Sat_48483	CTATGTTAGATTGACATGTGCAC	CATAGTGATGGCCAAACATC
Sat_48534	CTAAACTTTTCATACTCCAAACC	CAAATGTCATATGGGAAAGAC
Sat_202	GCGGGCCAAGTGAATAACAAGTTTATAAATT	GCGTCCTGCCACACCATTTTTATACTTTTAA
Sat_198	GCGTGATGATTTGTTGATATGACATTTA	GCGCCATTGAAACATACAGAGACTACAG
Sat_48690	CATGACGTGGGAACAATTGGTA	GTGAGTGAAATGTTTCAATTAA
Sat_48710	CCCAATCAAGTTCTAGGGATA	CGCCACTCACCCTTAGCATA
