# Supplementary material for: A Single-Nucleotide Polymorphism in an Endo-1,4-β-Glucanase Gene Controls Seed Coat Permeability in Soybean
Source: PLoS One. 2015 Jun 3;10(6):e0128527. doi: 10.1371/journal.pone.0128527 (PMC4454576; doi:10.1371/journal.pone.0128527)
Supplement: S2 Table — (XLSX) [file pone.0128527.s006.xlsx]

## Sheet: S2 table
S2 Table Primers used for sequencing and cloning
Primers	Sequence (5'®3')
A) Sequencing of cDNA sequence
02g 43680 seq 1827F	AACCCTCCACTTGTGGTGTA
02g 43680 seq 1913F	AAGGGAGGGGCAATGGAGAT
02g 43680 seq 2876F	TTCTACATCATGCCCTGCAG
02g 43680 seq 3365R	GCGTCGGTGAGTGGATACAT
02g 43680 seq 4992R	TAGAGGGGCATCCATTGTGT
02g 43680 seq 5109F	GGGAAAGACAATTTTGAGGACA
02g 43680 seq 5273R	ATTTGGTTGCCTCCTTCAAATGATA
02g 43680 seq 6307R	TCTCATAAGCCAAAAGCCAAGT
B) Sequencing and cloning of genomic region
02g 43680 Cloning F1	AGCAAGCTTAGAGGATTAAACAATTCAAAC
02g 43680 seq 133R	GTTGATTTGTACGTCATGACAAAA
02g 43680 seq 671R	AAAACTCTCGTTGCCCCTCT
02g 43680 seq 820F	TTGGGCATGAATGAAATCTG
02g 43680 seq 1141R	CCGTATTACAAATGACTCCTAAGAG
02g 43680 seq 1827F	AACCCTCCACTTGTGGTGTA
02g 43680 seq 2171R	GAAGAAGGGGTAGGTCCAAA
02g 43680 seq 2875F	TTCTACATCATGCCCTGCAG
02g 43680 seq 3170R	TCACAATTGAATGGACTACTGTCAC
02g 43680 seq 3832F	CCTGAAAATGATGGTGGGTTA
02g 43680 seq 4175R	TCCTTTCGTCGGCTAACATT
02g 43680 seq 4846F	GCACAGTGGACCATGAAGAA
02g 43680 seq 5188R	ACTGCCCCATTAGTTGGTGT
02g 43680 seq 5854F	TTCCTAGAAGACTAGCCCTGTG
02g 43680 seq 6206R	ATCCAAAAATCTTGCTGGGC
02g 43680 Cloning R1	GGCAAGCTTGCCCCCTGATTCTTGGCGTTCAAGT
Underlines: sequence of HindIII restriction site for cloning into binary vector pMDC123-GFP
