# Supplementary material for: A Single-Nucleotide Polymorphism in an Endo-1,4-β-Glucanase Gene Controls Seed Coat Permeability in Soybean
Source: PLoS One. 2015 Jun 3;10(6):e0128527. doi: 10.1371/journal.pone.0128527 (PMC4454576; doi:10.1371/journal.pone.0128527)
Supplement: S3 Table — (XLSX) [file pone.0128527.s007.xlsx]

## Sheet: S3 table
S3 Table Primers used for real-time PCR for 10 annotated genes in the 93-kb genomic region harboring qHS1
	Forward primer (5'®3')	Reverse Primer (5'®3')
Glyma02g43640	TTCGGGGGTACGTCGTACGTT	CACACTTCCAGACACCTCAT
Glyma02g43650	AATCATAATTCACGCAATTTGAGTT	GCAAATTAGATGTTACTGGTCTTGA
Glyma02g43660	TTTTTCAATCAATACTGGACTCTT	CTTTGACCTTTCTACCTCA
Glyma02g43680	GGGAAAGACAATTTTGAGGACA	TATCATTTTGAAGGAGGCAACCAAAT
Glyma02g43700	ATAATAATTCAAAACATTGCACT	ATACTATGCATGGAAACTTCGAAG
Glyma02g43710	GAGCTTGGCATTATGGTATTTCTCA	CATTTGATATCATTCACGAATGATGC
Glyma02g43720	ATCGCTGCTCTCGGTATTGT	AATCGGTTTCCGCCATTGGA
Glyma02g43740	CTCGCAGTGCTGGGAGTACA	CTCTTTTGGAAACAACTCACTGT
Glyma02g43750	ATCTTCTTGCTACTAGAACTATCC	GAACCACTTGATAACCAGGTCA
Glyma02g43760	TTAAGTATGAGCAAGAGCTTACA	TGAACCAGTTGTTGATCTGTTTCAT
β-tubulin (control) 1)	GACCCGATAACTTCGTGTTC	GTTTCCGAACACTCAAGCTC
1) Glyma08g01740.1
