# Supplementary material for: A Single-Nucleotide Polymorphism in an Endo-1,4-β-Glucanase Gene Controls Seed Coat Permeability in Soybean
Source: PLoS One. 2015 Jun 3;10(6):e0128527. doi: 10.1371/journal.pone.0128527 (PMC4454576; doi:10.1371/journal.pone.0128527)
Supplement: S4 Table — (XLSX) [file pone.0128527.s008.xlsx]

## Sheet: S4 table
S4 Table Annotation of predicted genes in a 93-kb genomic region harboring qHS1 (Phytozome Glyma1.0)
	Functional annotations
Glyma02g43640	Glycosyl hydrolases family 17, GLUCAN 1,3-BETA-GLUCOSIDASE-RELATED
Glyma02g43650	Protein kinase domain, Leucine Rich Repeat, Leucine rich repeat N-terminal domain
Glyma02g43660	Permease family, PURINE PERMEASE
Glyma02g43680	Glycosyl hydrolase family 9, ENDO-1,4-BETA-GLUCANASE
Glyma02g43700	PhoD-like phosphatase
Glyma02g43710	LysM domain, Protein kinase domain
Glyma02g43720	No functional annotations
Glyma02g43740	POT family, OLIGOPEPTIDE TRANSPORTER-RELATED
Glyma02g43750	Ribosomal protein L30p/L7e
Glyma02g43760	KNOX1 domain, KNOX2 domain, Homeobox domain, HOMEOBOX PROTEIN
